# Supplementary material
Source: Springer Nature journal article supplement (https://www.springermedizin.de/resource/supplementary/12913_2008_918_MOESM2_ESM.pdf/9536446)

**Distribution of ICF Codes Linked to 175 interRAI HC Items**

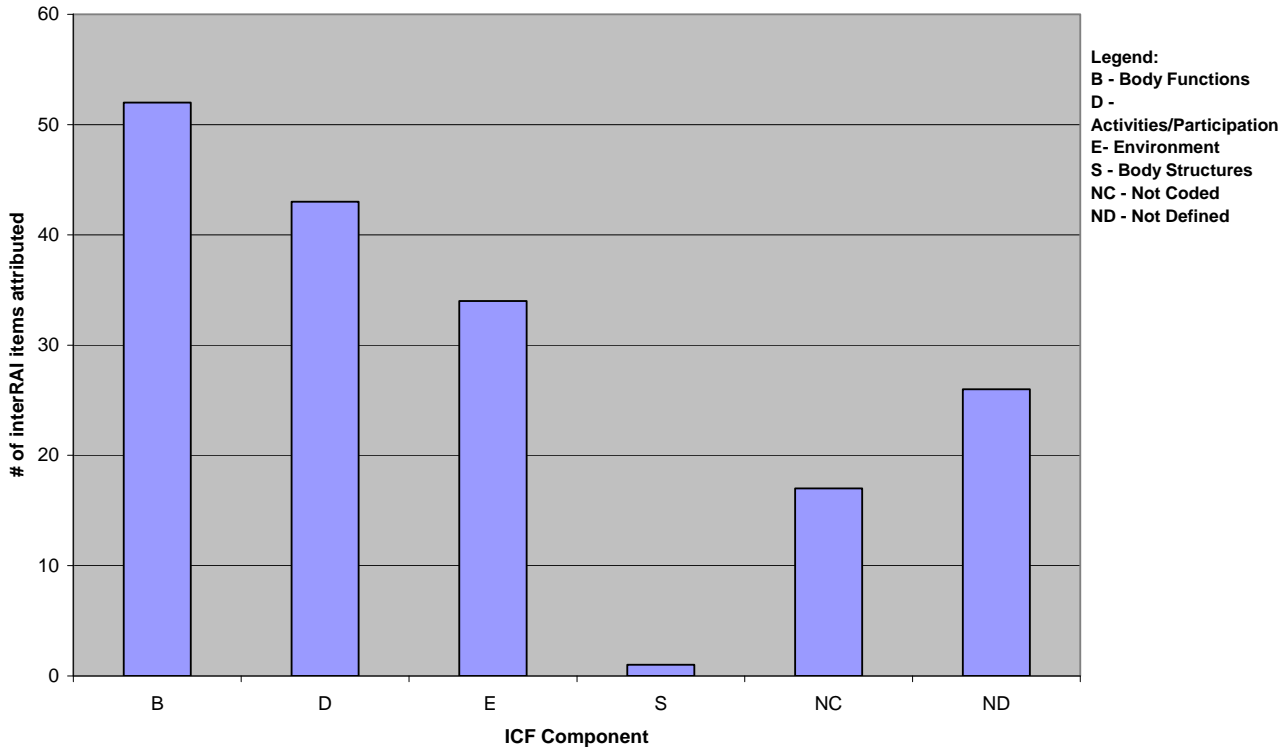

Supplement: MOESM2 [file 9536446]
